# Supplementary material for: Phenotypes and Multi-omics Reveal Changes and Molecular Mechanism of Suspension Adaptation of HEK293 Cells: Structural Remodelling, Metabolic Reconstruction and Stress Resistance
Source: Research Square preprint supplement (doi:10.21203/rs.3.rs-8498955/v1), 2026-01-13
Supplement: Supplementary file 1 [file 8ca85fb9c6048c1f0fc04f38.docx]

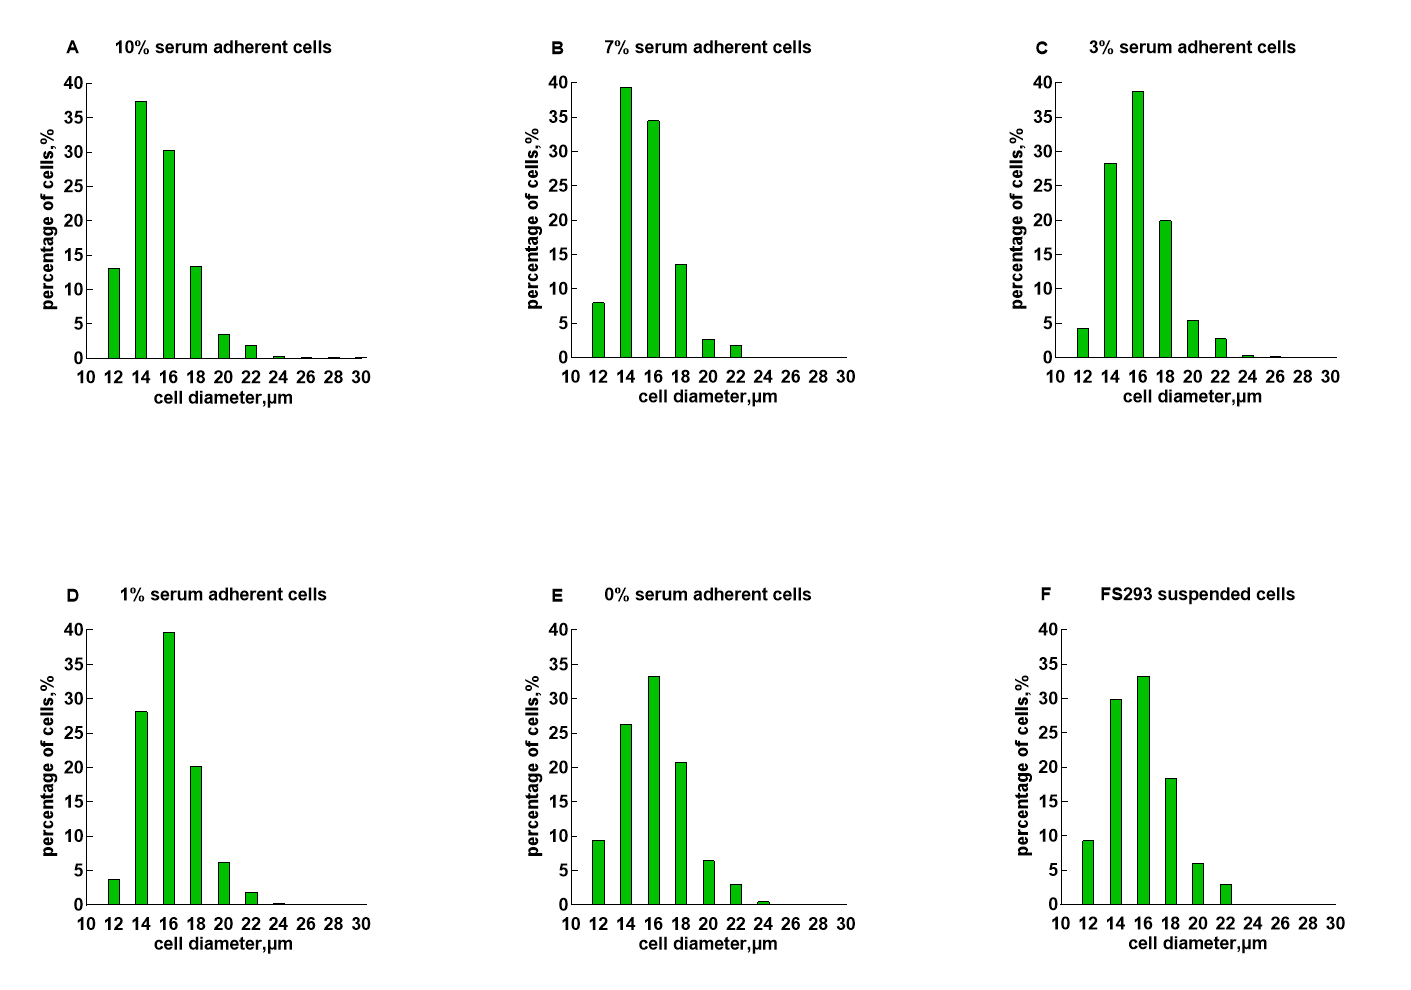


**Supplementary Figure 1.** Cell diameter distribution of different cells. All cells were collected and measured in the logistic growth phase. **Fig.1A**, adherent cells in complete DMEM containing 10% FBS. **Fig.1B**, adherent cells in 70% complete DMEM/30%SCM (7%FBS). **Fig.1C**, adherent cells in 30% complete DMEM/70%SCM (3%FBS). **Fig.1D**, adherent cells in 10% complete DMEM/90%SCM (1%FBS). **Fig.1E**, adherent cells in 1000%SCM (0%FBS). **Fig.1F,** suspension-adapted cells in serum-free SCM.
